# Supplementary material for: Chiral discrimination in solid-state interactions of cobalt(iii)–polyamine complex cations with tris-(dipicolinato)lanthanate(iii) anions
Source: Royal Society of Chemistry journal article supplement (doi:10.1039/c6ce02573k), 2017-01-01
Supplement: c6ce02573k1.pdf [file c6ce02573k1.pdf]

SUPPLEMENTARY INFORMATION

**Chiral Discrimination in Solid-state Interactions of Cobalt(III)-  
polyamine Complex Cations with *Tris*-(dipicolinato)lanthanate(III)  
Anions**

Jack M. Harrowfield, Yang Kim, Brian W. Skelton, Alexandre N. Sobolev and Allan H. White

**HYDROGEN BOND CONTACTS WITHIN THE LATTICES.**

**1. 2{ $\Delta, \Lambda$ -[Co(en)<sub>3</sub>] $\Delta, \Lambda$ [La(dipic)<sub>3</sub>] $\bullet$ 4.5H<sub>2</sub>O} CCDC 777292**

## Hydrogen-bond geometry (Å, °)

| <i>D</i> —H $\cdots$ <i>A</i>         | <i>D</i> —H | H $\cdots$ <i>A</i> | <i>D</i> $\cdots$ <i>A</i> | <i>D</i> —H $\cdots$ <i>A</i> |
|---------------------------------------|-------------|---------------------|----------------------------|-------------------------------|
| N1—H1AN $\cdots$ O01 <sup>i</sup>     | 0.91        | 2.39                | 3.1570 (19)                | 142                           |
| N1—H1AN $\cdots$ O02 <sup>ii</sup>    | 0.91        | 2.34                | 3.123 (2)                  | 144                           |
| N1—H1BN $\cdots$ O14 <sup>iii</sup>   | 0.91        | 1.97                | 2.875 (2)                  | 170                           |
| N1—H1BN $\cdots$ O13 <sup>iii</sup>   | 0.91        | 2.57                | 3.2563 (18)                | 133                           |
| N2—H2AN $\cdots$ O24 <sup>iii</sup>   | 0.91        | 2.03                | 2.8359 (18)                | 147                           |
| N2—H2BN $\cdots$ O32 <sup>iv</sup>    | 0.91        | 2.53                | 3.161 (2)                  | 127                           |
| N2—H2BN $\cdots$ O32                  | 0.91        | 2.62                | 3.446 (2)                  | 151                           |
| N3—H3AN $\cdots$ O23 <sup>iii</sup>   | 0.91        | 2.14                | 2.9462 (17)                | 148                           |
| N3—H3AN $\cdots$ O13 <sup>iii</sup>   | 0.91        | 2.64                | 3.2682 (19)                | 127                           |
| N3—H3BN $\cdots$ O03 <sup>iii</sup>   | 0.91        | 2.29                | 3.100 (2)                  | 148                           |
| N4—H4AN $\cdots$ O11                  | 0.91        | 2.03                | 2.9049 (17)                | 160                           |
| N4—H4BN $\cdots$ O04 <sup>iii</sup>   | 0.91        | 2.21                | 2.977 (2)                  | 141                           |
| N5—H5AN $\cdots$ O12                  | 0.91        | 2.05                | 2.8927 (18)                | 154                           |
| N6—H6AN $\cdots$ O01 <sup>i</sup>     | 0.91        | 1.97                | 2.8715 (19)                | 171                           |
| N6—H6BN $\cdots$ O32                  | 0.91        | 2.04                | 2.945 (2)                  | 173                           |
| O01—H011 $\cdots$ O02 <sup>v</sup>    | 0.85 (1)    | 1.99 (1)            | 2.735 (2)                  | 146 (2)                       |
| O01—H012 $\cdots$ O22 <sup>vi</sup>   | 0.85 (1)    | 1.88 (1)            | 2.657 (3)                  | 151 (2)                       |
| O01—H012 $\cdots$ O22 <sup>vi</sup>   | 0.85 (1)    | 1.94 (1)            | 2.757 (4)                  | 161 (2)                       |
| O02—H021 $\cdots$ O03                 | 0.85 (1)    | 1.99 (1)            | 2.809 (2)                  | 162 (3)                       |
| O02—H022 $\cdots$ O34 <sup>vii</sup>  | 0.85 (1)    | 1.89 (1)            | 2.732 (2)                  | 171 (2)                       |
| O03—H031 $\cdots$ O34                 | 0.85 (1)    | 2.01 (1)            | 2.809 (2)                  | 158 (2)                       |
| O03—H031 $\cdots$ O33                 | 0.85 (1)    | 2.52 (1)            | 3.2168 (18)                | 141 (2)                       |
| O03—H032 $\cdots$ O14 <sup>v</sup>    | 0.85 (1)    | 2.01 (1)            | 2.8216 (19)                | 161 (3)                       |
| O04—H041 $\cdots$ O31 <sup>viii</sup> | 0.85 (1)    | 2.07 (1)            | 2.873 (2)                  | 156 (3)                       |
| O04—H042 $\cdots$ O22 <sup>vi</sup>   | 0.85 (1)    | 2.54 (2)            | 3.270 (5)                  | 145 (2)                       |
| O05—H051 $\cdots$ O22                 | 0.86 (1)    | 1.98 (1)            | 2.810 (4)                  | 164 (2)                       |
| O05—H051 $\cdots$ O22'                | 0.86 (1)    | 2.56 (1)            | 3.296 (5)                  | 144 (1)                       |

Symmetry codes: (i)  $x, -y+2, z-1/2$ ; (ii)  $-x+1/2, -y+3/2, -z+1$ ; (iii)  $x, -y+1, z-1/2$ ; (iv)  $-x, y, -z+1/2$ ; (v)  $-x+1/2, y+1/2, -z+3/2$ ;

(vi)  $x, -y+1, z+1/2$ ; (vii)

$-x+1/2, y-1/2, -z+3/2$ ; (viii)  $-x, -y+1, -z+1$ .

**2.  $\Delta, \Lambda$ -[Co(en)<sub>3</sub>] $\Delta, \Lambda$ -[La(dipic)<sub>3</sub>] $\bullet$ 4H<sub>2</sub>O CCDC 777293**

## Hydrogen-bond geometry (Å, °)

| <i>D</i> —H $\cdots$ <i>A</i>       | <i>D</i> —H | H $\cdots$ <i>A</i> | <i>D</i> $\cdots$ <i>A</i> | <i>D</i> —H $\cdots$ <i>A</i> |
|-------------------------------------|-------------|---------------------|----------------------------|-------------------------------|
| N1—H1AN $\cdots$ O3 <sup>i</sup>    | 0.91        | 2.22                | 3.032 (4)                  | 149                           |
| N1—H1AN $\cdots$ O2 <sup>ii</sup>   | 0.91        | 2.63                | 3.369 (4)                  | 139                           |
| N1—H1BN $\cdots$ O34                | 0.91        | 1.96                | 2.865 (4)                  | 174                           |
| N1—H1BN $\cdots$ O33                | 0.91        | 2.63                | 3.294 (4)                  | 130                           |
| N2—H2AN $\cdots$ O14                | 0.91        | 2.00                | 2.861 (4)                  | 157                           |
| N2—H2BN $\cdots$ O22 <sup>iii</sup> | 0.91        | 2.50                | 3.089 (4)                  | 123                           |
| N3—H3AN $\cdots$ O13                | 0.91        | 2.27                | 3.030 (3)                  | 141                           |
| N3—H3AN $\cdots$ O33                | 0.91        | 2.50                | 3.151 (4)                  | 129                           |
| N3—H3BN $\cdots$ O1                 | 0.91        | 2.18                | 3.013 (4)                  | 152                           |
| N4—H4AN $\cdots$ O31 <sup>iv</sup>  | 0.91        | 2.06                | 2.927 (3)                  | 159                           |
| N4—H4BN $\cdots$ O4                 | 0.91        | 2.10                | 2.981 (5)                  | 164                           |
| N5—H5AN $\cdots$ O32 <sup>iv</sup>  | 0.91        | 2.04                | 2.893 (4)                  | 155                           |
| N5—H5BN $\cdots$ O24 <sup>i</sup>   | 0.91        | 2.52                | 3.099 (4)                  | 122                           |
| N6—H6AN $\cdots$ O2 <sup>ii</sup>   | 0.91        | 1.95                | 2.852 (4)                  | 170                           |
| N6—H6BN $\cdots$ O22 <sup>iv</sup>  | 0.91        | 1.98                | 2.892 (4)                  | 177                           |
| O1—H01A $\cdots$ O24                | 0.85 (1)    | 2.19 (2)            | 2.947 (4)                  | 148 (3)                       |

|                             |          |          |           |         |
|-----------------------------|----------|----------|-----------|---------|
| O1—H01A···O23               | 0.85 (1) | 2.27 (2) | 3.040 (4) | 151 (3) |
| O1—H01B···O34 <sup>v</sup>  | 0.85 (1) | 2.08 (2) | 2.872 (4) | 154 (5) |
| O2—H02A···O3 <sup>v</sup>   | 0.85 (1) | 2.06 (2) | 2.793 (4) | 144 (3) |
| O2—H02B···O12 <sup>iv</sup> | 0.85 (1) | 1.93 (1) | 2.745 (4) | 161 (3) |
| O3—H03A···O1                | 0.85 (1) | 2.04 (2) | 2.832 (4) | 154 (4) |
| O3—H03B···O24 <sup>i</sup>  | 0.85 (1) | 1.88 (2) | 2.682 (4) | 158 (4) |
| O4—H04A···O21 <sup>iv</sup> | 0.85 (1) | 2.45 (3) | 3.201 (4) | 147 (4) |
| O4—H04B···O12 <sup>vi</sup> | 0.85 (1) | 2.30 (2) | 3.123 (4) | 162 (5) |

Symmetry codes: (i)  $-x+2, y-1/2, -z+1/2$ ; (ii)  $x, y-1, z$ ; (iii)  $-x+1, y-1/2, -z+1/2$ ; (iv)  $x, -y+3/2, z-1/2$ ; (v)  $-x+2, y+1/2, -z+1/2$ ; (vi)  $-x+1, y+1/2, -z+1/2$ .

### 3. 2{ $\Delta$ -[Co(en)<sub>3</sub>] $\Delta$ , $\Lambda$ -[La(dipic)<sub>3</sub>]}•6.5H<sub>2</sub>O} CCDC 777294

#### Hydrogen-bond geometry (Å, °)

| <i>D</i> —H··· <i>A</i>         | <i>D</i> —H | H··· <i>A</i> | <i>D</i> ··· <i>A</i> | <i>D</i> —H··· <i>A</i> |
|---------------------------------|-------------|---------------|-----------------------|-------------------------|
| N11—H11C···O134                 | 0.91        | 2.27          | 2.980 (3)             | 134                     |
| N11—H11C···O234 <sup>i</sup>    | 0.91        | 2.30          | 3.035 (3)             | 137                     |
| N11—H11D···O213 <sup>i</sup>    | 0.91        | 2.35          | 3.199 (3)             | 156                     |
| N11—H11D···O233 <sup>i</sup>    | 0.91        | 2.51          | 3.138 (3)             | 127                     |
| N12—H12C···O07 <sup>ii</sup>    | 0.91        | 2.12          | 2.982 (3)             | 157                     |
| N12—H12D···O112 <sup>ii</sup>   | 0.91        | 1.98          | 2.824 (3)             | 154                     |
| N13—H13C···O07 <sup>ii</sup>    | 0.91        | 2.36          | 3.069 (4)             | 135                     |
| N13—H13D···O223 <sup>i</sup>    | 0.91        | 2.30          | 3.199 (3)             | 168                     |
| N13—H13D···O224 <sup>i</sup>    | 0.91        | 2.64          | 3.379 (4)             | 139                     |
| N14—H14C···O09 <sup>ii</sup>    | 0.91        | 2.20          | 2.961 (3)             | 141                     |
| N14—H14D···O112 <sup>ii</sup>   | 0.91        | 2.05          | 2.940 (3)             | 165                     |
| N15—H15C···O09 <sup>ii</sup>    | 0.91        | 2.38          | 3.095 (3)             | 136                     |
| N15—H15C···O224 <sup>i</sup>    | 0.91        | 2.40          | 3.075 (4)             | 131                     |
| N15—H15D···O233 <sup>i</sup>    | 0.91        | 2.20          | 3.083 (3)             | 164                     |
| N16—H16C···O134                 | 0.91        | 1.94          | 2.845 (3)             | 175                     |
| N16—H16D···O222                 | 0.91        | 2.30          | 3.003 (4)             | 134                     |
| N21—H21C···O13 <sup>iii</sup>   | 0.91        | 2.33          | 3.208 (4)             | 162                     |
| N21—H21D···O124                 | 0.91        | 2.25          | 3.139 (3)             | 167                     |
| N21—H21D···O123                 | 0.91        | 2.58          | 3.309 (3)             | 137                     |
| N22—H22C···O04                  | 0.91        | 2.23          | 3.042 (3)             | 148                     |
| N22—H22D···O221                 | 0.91        | 2.18          | 3.072 (3)             | 167                     |
| N23—H23C···O02                  | 0.91        | 2.04          | 2.814 (3)             | 142                     |
| N23—H23D···O01 <sup>iii</sup>   | 0.91        | 2.04          | 2.863 (3)             | 149                     |
| N23—H23D···O124                 | 0.91        | 2.61          | 3.044 (3)             | 110                     |
| N24—H24C···O212                 | 0.91        | 2.16          | 2.879 (3)             | 136                     |
| N24—H24D···O08 <sup>iv</sup>    | 0.91        | 2.07          | 2.851 (3)             | 143                     |
| N24—H24D···O211                 | 0.91        | 2.61          | 3.147 (3)             | 119                     |
| N25—H25C···O132 <sup>iii</sup>  | 0.91        | 2.05          | 2.932 (3)             | 164                     |
| N25—H25D···O10 <sup>iii</sup>   | 0.91        | 2.29          | 3.145 (4)             | 156                     |
| N26—H26C···O11                  | 0.91        | 2.31          | 3.134 (4)             | 150                     |
| N26—H26D···O211                 | 0.91        | 2.13          | 3.002 (3)             | 160                     |
| O01—H011···O05                  | 0.85 (1)    | 2.00 (1)      | 2.834 (3)             | 167 (3)                 |
| O01—H012···O224 <sup>v</sup>    | 0.85 (1)    | 1.87 (1)      | 2.714 (3)             | 178 (4)                 |
| O02—H021···O113                 | 0.85 (1)    | 1.91 (1)      | 2.743 (3)             | 167 (4)                 |
| O02—H022···O06 <sup>vi</sup>    | 0.85 (1)    | 1.96 (1)      | 2.800 (3)             | 171 (3)                 |
| O03—H031···O04 <sup>vii</sup>   | 0.85 (1)    | 1.88 (1)      | 2.723 (3)             | 172 (4)                 |
| O03—H032···O134                 | 0.85 (1)    | 1.98 (1)      | 2.832 (3)             | 176 (4)                 |
| O04—H041···O114                 | 0.85 (1)    | 1.91 (1)      | 2.751 (3)             | 175 (4)                 |
| O04—H042···O232                 | 0.85 (1)    | 1.91 (1)      | 2.758 (3)             | 171 (4)                 |
| O05—H051···O122 <sup>viii</sup> | 0.84 (1)    | 1.90 (1)      | 2.748 (3)             | 178 (4)                 |
| O05—H052···O132                 | 0.85 (1)    | 1.91 (2)      | 2.728 (3)             | 161 (4)                 |
| O06—H061···O03                  | 0.85 (1)    | 1.93 (1)      | 2.776 (3)             | 175 (4)                 |

|                                 |          |          |           |         |
|---------------------------------|----------|----------|-----------|---------|
| O06—H062···O12                  | 0.85 (1) | 1.81 (1) | 2.660 (3) | 176 (4) |
| O07—H071···O214 <sup>v</sup>    | 0.85 (1) | 2.08 (2) | 2.858 (4) | 153 (4) |
| O07—H072···O122                 | 0.85 (1) | 2.06 (2) | 2.852 (4) | 156 (4) |
| O08—H081···O231 <sup>viii</sup> | 0.85 (1) | 1.98 (2) | 2.785 (3) | 159 (5) |
| O08—H082···O11 <sup>i</sup>     | 0.85 (1) | 2.51 (2) | 3.316 (5) | 159 (4) |
| O09—H091···O05                  | 0.86 (1) | 1.97 (1) | 2.821 (3) | 175 (4) |
| O09—H092···O214 <sup>ix</sup>   | 0.85 (1) | 1.95 (1) | 2.795 (3) | 169 (4) |
| O10—H10E···O124 <sup>x</sup>    | 0.85 (1) | 1.99 (1) | 2.836 (4) | 170 (6) |
| O10—H10F···O223 <sup>v</sup>    | 0.85 (1) | 2.20 (2) | 3.026 (4) | 165 (5) |
| O11—H11E···O13 <sup>iii</sup>   | 0.85 (1) | 2.11 (3) | 2.906 (6) | 155 (6) |
| O11—H11F···O03                  | 0.85 (1) | 2.01 (3) | 2.801 (4) | 155 (6) |
| O12—H12E···O123                 | 0.85 (1) | 1.95 (1) | 2.787 (3) | 174 (4) |
| O12—H12F···O212 <sup>x</sup>    | 0.85 (1) | 1.92 (1) | 2.750 (3) | 166 (4) |

Symmetry codes: (i)  $-x+1, y-1/2, -z+1$ ; (ii)  $-x+1, y+1/2, -z+1$ ; (iii)  $-x+1, y+1/2, -z$ ; (iv)  $-x+2, y+1/2, -z+1$ ; (v)  $x, y-1, z$ ; (vi)  $x+1, y, z$ ; (vii)  $x-1, y, z$ ; (viii)  $-x+2, y-1/2, -z+1$ ; (ix)  $x-1, y-1, z$ ; (x)  $-x+1, y-1/2, -z$ .

#### 4. 2{ $\Delta$ -[Co(en)<sub>3</sub>] $\Delta$ , $\Lambda$ -[Gd(dipic)<sub>3</sub>]}•6.5H<sub>2</sub>O} CCDC 777295

Hydrogen-bond geometry (Å, °)

| <i>D</i> —H··· <i>A</i>        | <i>D</i> —H | H··· <i>A</i> | <i>D</i> ··· <i>A</i> | <i>D</i> —H··· <i>A</i> |
|--------------------------------|-------------|---------------|-----------------------|-------------------------|
| N11—H11C···O134                | 0.91        | 2.25          | 2.964 (3)             | 135                     |
| N11—H11C···O234 <sup>i</sup>   | 0.91        | 2.28          | 3.016 (3)             | 137                     |
| N11—H11D···O213 <sup>i</sup>   | 0.91        | 2.34          | 3.211 (3)             | 160                     |
| N11—H11D···O233 <sup>i</sup>   | 0.91        | 2.56          | 3.178 (3)             | 126                     |
| N12—H12C···O07 <sup>ii</sup>   | 0.91        | 2.13          | 2.983 (3)             | 156                     |
| N12—H12D···O112 <sup>ii</sup>  | 0.91        | 1.98          | 2.825 (3)             | 153                     |
| N13—H13C···O07 <sup>ii</sup>   | 0.91        | 2.28          | 3.013 (3)             | 137                     |
| N13—H13D···O223 <sup>i</sup>   | 0.91        | 2.26          | 3.150 (3)             | 167                     |
| N13—H13D···O224 <sup>i</sup>   | 0.91        | 2.58          | 3.316 (3)             | 138                     |
| N14—H14C···O09 <sup>ii</sup>   | 0.91        | 2.18          | 2.948 (3)             | 141                     |
| N14—H14D···O112 <sup>ii</sup>  | 0.91        | 2.00          | 2.885 (3)             | 165                     |
| N15—H15C···O224 <sup>i</sup>   | 0.91        | 2.55          | 3.207 (3)             | 130                     |
| N15—H15C···O09 <sup>ii</sup>   | 0.91        | 2.35          | 3.066 (3)             | 135                     |
| N15—H15D···O233 <sup>i</sup>   | 0.91        | 2.17          | 3.055 (3)             | 165                     |
| N16—H16C···O134                | 0.91        | 1.93          | 2.831 (3)             | 173                     |
| N16—H16D···O222                | 0.91        | 2.34          | 3.048 (3)             | 134                     |
| N21—H21C···O13 <sup>iii</sup>  | 0.91        | 2.39          | 3.269 (4)             | 162                     |
| N21—H21D···O124                | 0.91        | 2.19          | 3.088 (3)             | 170                     |
| N22—H22C···O04                 | 0.91        | 2.22          | 3.023 (3)             | 147                     |
| N22—H22D···O221                | 0.91        | 2.23          | 3.125 (3)             | 167                     |
| N23—H23C···O02                 | 0.91        | 2.00          | 2.783 (3)             | 144                     |
| N23—H23D···O01 <sup>iii</sup>  | 0.91        | 2.04          | 2.858 (3)             | 149                     |
| N24—H24C···O212                | 0.91        | 2.14          | 2.863 (3)             | 136                     |
| N24—H24D···O211                | 0.91        | 2.65          | 3.188 (3)             | 118                     |
| N24—H24D···O08 <sup>iv</sup>   | 0.91        | 2.08          | 2.857 (3)             | 142                     |
| N25—H25C···O132 <sup>iii</sup> | 0.91        | 2.02          | 2.898 (3)             | 161                     |
| N25—H25D···O10 <sup>iii</sup>  | 0.91        | 2.23          | 3.082 (4)             | 156                     |

|                              |          |          |           |         |
|------------------------------|----------|----------|-----------|---------|
| N26—H26C···O11               | 0.91     | 2.34     | 3.150 (3) | 148     |
| N26—H26D···O211              | 0.91     | 2.09     | 2.971 (3) | 163     |
| O01—H011···O05               | 0.85 (1) | 1.99 (1) | 2.838 (3) | 172 (4) |
| O01—H012···O224v             | 0.85 (1) | 1.88 (1) | 2.707 (3) | 162 (4) |
| O02—H021···O113              | 0.85 (1) | 1.89 (1) | 2.713 (3) | 164 (3) |
| O02—H022···O06vi             | 0.85 (1) | 1.94 (1) | 2.785 (3) | 176 (3) |
| O03—H031···O04vii            | 0.84 (1) | 1.91 (1) | 2.716 (3) | 159 (2) |
| O03—H032···O134              | 0.85 (1) | 1.98 (1) | 2.817 (3) | 169 (4) |
| O04—H041···O114              | 0.85 (1) | 1.92 (1) | 2.754 (3) | 166 (3) |
| O04—H042···O232              | 0.85 (1) | 1.96 (1) | 2.755 (3) | 155 (2) |
| O05—H051···O122vii           | 0.85 (1) | 1.90 (1) | 2.743 (3) | 171 (4) |
| O05—H052···O132              | 0.85 (1) | 1.92 (1) | 2.742 (3) | 162 (4) |
| O06—H061···O03               | 0.85 (1) | 1.92 (1) | 2.760 (3) | 174 (3) |
| O06—H062···O12               | 0.85 (1) | 1.83 (1) | 2.643 (3) | 160 (3) |
| O07—H071···O214v             | 0.85 (1) | 2.09 (2) | 2.899 (3) | 158 (4) |
| O07—H072···O122              | 0.85 (1) | 1.95 (1) | 2.788 (3) | 172 (3) |
| O08—H081···O231viii          | 0.85 (1) | 2.03 (2) | 2.788 (3) | 147 (4) |
| O08—H081···O232viii          | 0.85 (1) | 2.64 (2) | 3.421 (3) | 154 (3) |
| O08—H082···O11i              | 0.85 (1) | 2.29 (1) | 3.131 (4) | 170 (3) |
| O09—H091···O05               | 0.85 (1) | 1.96 (1) | 2.806 (3) | 170 (4) |
| O09—H092···O214ix            | 0.85 (1) | 1.94 (1) | 2.778 (3) | 169 (4) |
| O10—H10E···O124x             | 0.85 (1) | 2.02 (1) | 2.862 (3) | 174 (4) |
| O10—H10F···O223v             | 0.85 (1) | 2.45 (1) | 3.275 (3) | 164 (3) |
| O10—H10F···O224v             | 0.85 (1) | 2.53 (3) | 3.118 (4) | 127 (3) |
| O11—H11E···O13iii            | 0.85 (1) | 2.10 (2) | 2.903 (4) | 158 (4) |
| O11—H11F···O03               | 0.85 (1) | 1.96 (1) | 2.789 (3) | 164 (3) |
| O12—H12E···O123              | 0.85 (1) | 1.95 (1) | 2.790 (3) | 168 (4) |
| O12—H12E···O124              | 0.85 (1) | 2.65 (3) | 3.313 (3) | 136 (4) |
| O12—H12F···O212 <sup>x</sup> | 0.85 (1) | 1.94 (2) | 2.751 (3) | 159 (4) |
| O13—H13E···O06 <sup>x</sup>  | 0.85 (1) | 2.04 (2) | 2.747 (3) | 141 (3) |
| O13—H13F···O10               | 0.85 (1) | 2.10 (1) | 2.943 (4) | 171 (4) |

Symmetry codes: (i)  $-x+1, y-1/2, -z+1$ ; (ii)  $-x+1, y+1/2, -z+1$ ; (iii)  $-x+1, y+1/2, -z$ ; (iv)  $-x+2, y+1/2, -z+1$ ; (v)  $x, y-1, z$ ; (vi)  $x+1, y, z$ ; (vii)  $x-1, y, z$ ; (viii)  $-x+2, y-1/2, -z+1$ ; (ix)  $x-1, y-1, z$ ; (x)  $-x+1, y-1/2, -z$ .

## 5. $2\{\Delta\text{-}[\text{Co}(\text{en})_3]\Delta, \Lambda\text{-}[\text{Gd}(\text{dipic})_3]\bullet 8.5\text{H}_2\text{O}\}$ CCDC 777296

Hydrogen-bond geometry ( $\text{\AA}$ ,  $^\circ$ )

| $D\text{---}H\cdots A$       | $D\text{---}H$ | $H\cdots A$ | $D\cdots A$ | $D\text{---}H\cdots A$ |
|------------------------------|----------------|-------------|-------------|------------------------|
| N11—H11C···O221 <sup>i</sup> | 0.91           | 2.12        | 2.973 (6)   | 156                    |
| N11—H11D···O211 <sup>i</sup> | 0.91           | 2.65        | 3.149 (7)   | 115                    |
| N11—H11D···O212i             | 0.91           | 2.59        | 3.153 (7)   | 121                    |
| N11—H11D···O11ii             | 0.91           | 2.07        | 2.897 (8)   | 150                    |
| N12—H12C···O121              | 0.91           | 2.66        | 3.363 (6)   | 135                    |
| N12—H12C···O131              | 0.91           | 2.42        | 3.153 (6)   | 137                    |
| N13—H13C···O122              | 0.91           | 2.19        | 3.045 (7)   | 157                    |
| N13—H13D···O11iii            | 0.91           | 2.42        | 2.969 (7)   | 119                    |

|                     |      |      |           |     |
|---------------------|------|------|-----------|-----|
| N13—H13D···O16iii   | 0.91 | 2.47 | 3.237 (7) | 143 |
| N14—H14C···O07iv    | 0.91 | 2.05 | 2.923 (6) | 160 |
| N14—H14D···O132     | 0.91 | 1.93 | 2.811 (8) | 163 |
| N15—H15C···O232v    | 0.91 | 2.53 | 3.175 (7) | 128 |
| N15—H15D···O212i    | 0.91 | 1.95 | 2.844 (7) | 168 |
| N16—H16C···O222i    | 0.91 | 2.03 | 2.915 (7) | 164 |
| N16—H16D···O16      | 0.91 | 2.00 | 2.809 (7) | 147 |
| N21—H21C···O114     | 0.91 | 2.23 | 3.031 (7) | 147 |
| N21—H21D···O10vi    | 0.91 | 2.27 | 3.115 (7) | 155 |
| N22—H22C···O06      | 0.91 | 2.38 | 3.085 (8) | 134 |
| N22—H22C···O09      | 0.91 | 2.64 | 3.379 (8) | 139 |
| N22—H22D···O134     | 0.91 | 1.87 | 2.765 (7) | 166 |
| N23—H23C···O09      | 0.91 | 1.98 | 2.880 (7) | 170 |
| N23—H23D···O224vii  | 0.91 | 2.57 | 3.074 (7) | 116 |
| N23—H23D···O10vi    | 0.91 | 2.33 | 3.155 (9) | 152 |
| N24—H24C···O214vii  | 0.91 | 2.13 | 3.019 (7) | 165 |
| N24—H24D···O134     | 0.91 | 2.35 | 3.141 (7) | 146 |
| N25—H25C···O213vii  | 0.91 | 2.31 | 3.218 (7) | 172 |
| N25—H25C···O214vii  | 0.91 | 2.64 | 3.294 (8) | 130 |
| N25—H25D···O06vi    | 0.91 | 2.54 | 3.297 (9) | 141 |
| N25—H25D···O10vi    | 0.91 | 2.24 | 2.992 (8) | 140 |
| N26—H26C···O113     | 0.91 | 2.55 | 3.286 (8) | 139 |
| N26—H26C···O133     | 0.91 | 2.42 | 3.001 (7) | 122 |
| N26—H26D···O03      | 0.91 | 2.19 | 3.068 (8) | 163 |
| O01—H01E···O09iv    | 0.85 | 1.94 | 2.774 (7) | 167 |
| O01—H01F···O214vii  | 0.85 | 1.89 | 2.700 (6) | 160 |
| O02—H02E···O12      | 0.85 | 1.85 | 2.700 (5) | 174 |
| O02—H02F···O122i    | 0.85 | 1.91 | 2.758 (6) | 173 |
| O03—H03E···O123     | 0.85 | 1.99 | 2.815 (6) | 162 |
| O03—H03F···O01      | 0.85 | 2.02 | 2.776 (7) | 148 |
| O04—H04E···O113     | 0.85 | 1.96 | 2.810 (7) | 174 |
| O04—H04F···O224     | 0.85 | 1.98 | 2.803 (6) | 162 |
| O05—H05E···O112     | 0.85 | 2.14 | 2.956 (6) | 162 |
| O05—H05F···O132viii | 0.85 | 1.95 | 2.788 (6) | 168 |
| O06—H06E···O10      | 0.85 | 2.45 | 2.940 (7) | 117 |
| O06—H06F···O234ix   | 0.85 | 1.94 | 2.769 (8) | 166 |
| O07—H07E···O112     | 0.85 | 1.94 | 2.780 (6) | 170 |
| O07—H07F···O13ii    | 0.85 | 1.94 | 2.732 (7) | 154 |
| O08—H08E···O03      | 0.85 | 2.31 | 2.871 (7) | 123 |
| O08—H08F···O234x    | 0.85 | 2.04 | 2.798 (7) | 148 |
| O09—H09E···O08viii  | 0.85 | 1.91 | 2.712 (7) | 157 |
| O09—H09F···O04vii   | 0.85 | 2.00 | 2.670 (6) | 135 |
| O10—H10E···O17      | 0.85 | 1.93 | 2.683 (6) | 148 |
| O10—H10F···O223ix   | 0.85 | 1.92 | 2.742 (6) | 163 |

|                               |      |      |           |     |
|-------------------------------|------|------|-----------|-----|
| O11—H11E···O02                | 0.85 | 2.04 | 2.807 (6) | 150 |
| O11—H11F···O05                | 0.85 | 2.17 | 2.800 (7) | 130 |
| O12—H12E···O07                | 0.85 | 2.01 | 2.801 (6) | 155 |
| O12—H12F···O231 <sup>i</sup>  | 0.85 | 2.10 | 2.875 (6) | 151 |
| O13—H13E···O02                | 0.85 | 1.92 | 2.757 (6) | 168 |
| O13—H13F···O232 <sup>ix</sup> | 0.85 | 2.08 | 2.804 (6) | 142 |
| O14—H14E···O08                | 0.85 | 2.40 | 2.974 (6) | 126 |
| O14—H14F···O124 <sup>xi</sup> | 0.85 | 2.11 | 2.900 (7) | 155 |
| O15—H15E···O112               | 0.85 | 2.04 | 2.795 (6) | 148 |
| O15—H15F···O16                | 0.85 | 1.97 | 2.726 (9) | 148 |
| O16—H16E···O132               | 0.85 | 2.54 | 3.326 (7) | 154 |
| O16—H16F···O212 <sup>x</sup>  | 0.85 | 1.96 | 2.764 (6) | 158 |
| O17—H17E···O01 <sup>xi</sup>  | 0.85 | 2.07 | 2.843 (7) | 151 |
| O17—H17F···O14                | 0.85 | 2.12 | 2.745 (9) | 130 |

Symmetry codes: (i)  $-x+1, y+1/2, -z+2$ ; (ii)  $-x+1, y-1/2, -z+2$ ; (iii)  $-x, y-1/2, -z+2$ ; (iv)  $x-1, y, z$ ; (v)  $-x, y+1/2, -z+2$ ; (vi)  $-x+1, y-1/2, -z+1$ ; (vii)  $-x+1, y+1/2, -z+1$ ; (viii)  $x+1, y, z$ ; (ix)  $x, y+1, z$ ; (x)  $x-1, y+1, z$ ; (xi)  $-x, y+1/2, -z+1$ .

## 6. $\Delta$ -[Co((NO<sub>2</sub>)<sub>2</sub>sar)] $\Lambda$ -[Gd(dipic)<sub>3</sub>]•12H<sub>2</sub>O CCDC 777297

Hydrogen-bond geometry (Å, °)

| <i>D</i> —H··· <i>A</i>                        | <i>D</i> —H | H··· <i>A</i> | <i>D</i> ··· <i>A</i> | <i>D</i> —H··· <i>A</i> |
|------------------------------------------------|-------------|---------------|-----------------------|-------------------------|
| N3 <i>A</i> —H3 <i>A</i> ···O03 <sup>i</sup>   | 0.91        | 2.06          | 2.92 (2)              | 157                     |
| N3 <i>A</i> '—H3 <i>A</i> '···O03'             | 0.91        | 2.04          | 2.89 (2)              | 156                     |
| N3 <i>B</i> —H3 <i>B</i> ···O04 <sup>ii</sup>  | 0.91        | 2.04          | 2.864 (10)            | 151                     |
| N3 <i>C</i> —H3 <i>C</i> ···O12 <sup>iii</sup> | 0.91        | 2.05          | 2.875 (7)             | 150                     |

Symmetry codes: (i)  $y, x, -z+1$ ; (ii)  $x-1, y-1, z$ ; (iii)  $-x+1, -x+y+1, -z+2/3$ .
